# Supplementary material for: Long noncoding RNA TUG1 facilitates osteogenic differentiation of periodontal ligament stem cells via interacting with Lin28A
Source: PubMed Central journal article supplement (PMC5908786; doi:10.1038/s41419-018-0484-2), 2018-04-19
Supplement: 41419_2018_484_MOESM4_ESM.pdf [file 41419_2018_484_MOESM4_ESM.pdf]

## Interaction between ENST00000519077(ncRNA) and ENST00000326279(mRNA)

### Genomic coordinates of transcripts

ENST00000519077

ENST00000326279

### Interaction energy bewteen these transcripts

|           |                   |
|-----------|-------------------|
| SumEnergy | -3775.24 kcal/mol |
| MinEnergy | -22.26 kcal/mol   |

### Informtion of the interaction site with MinEnergy

Position of the interaction site on transcripts

|                 |           |
|-----------------|-----------|
| ENST00000519077 | 4759-4815 |
| ENST00000326279 | 1780-1836 |

Location of the interaction site on mRNA

|             |  |
|-------------|--|
| 5'-UTR      |  |
| start codon |  |
| CDS         |  |
